# Supplementary material for: BRAT1 links Integrator and defective RNA processing with neurodegeneration
Source: PubMed Central journal article supplement (PMC9418311; doi:10.1038/s41467-022-32763-6), 2022-08-26
Supplement: 41467_2022_32763_MOESM1_ESM.pdf [file 41467_2022_32763_MOESM1_ESM.pdf]

## **Supplementary Figures**

### **BRAT1 Links Integrator and Defective RNA Processing with Neurodegeneration**

Zuzana Cihlarova et al.

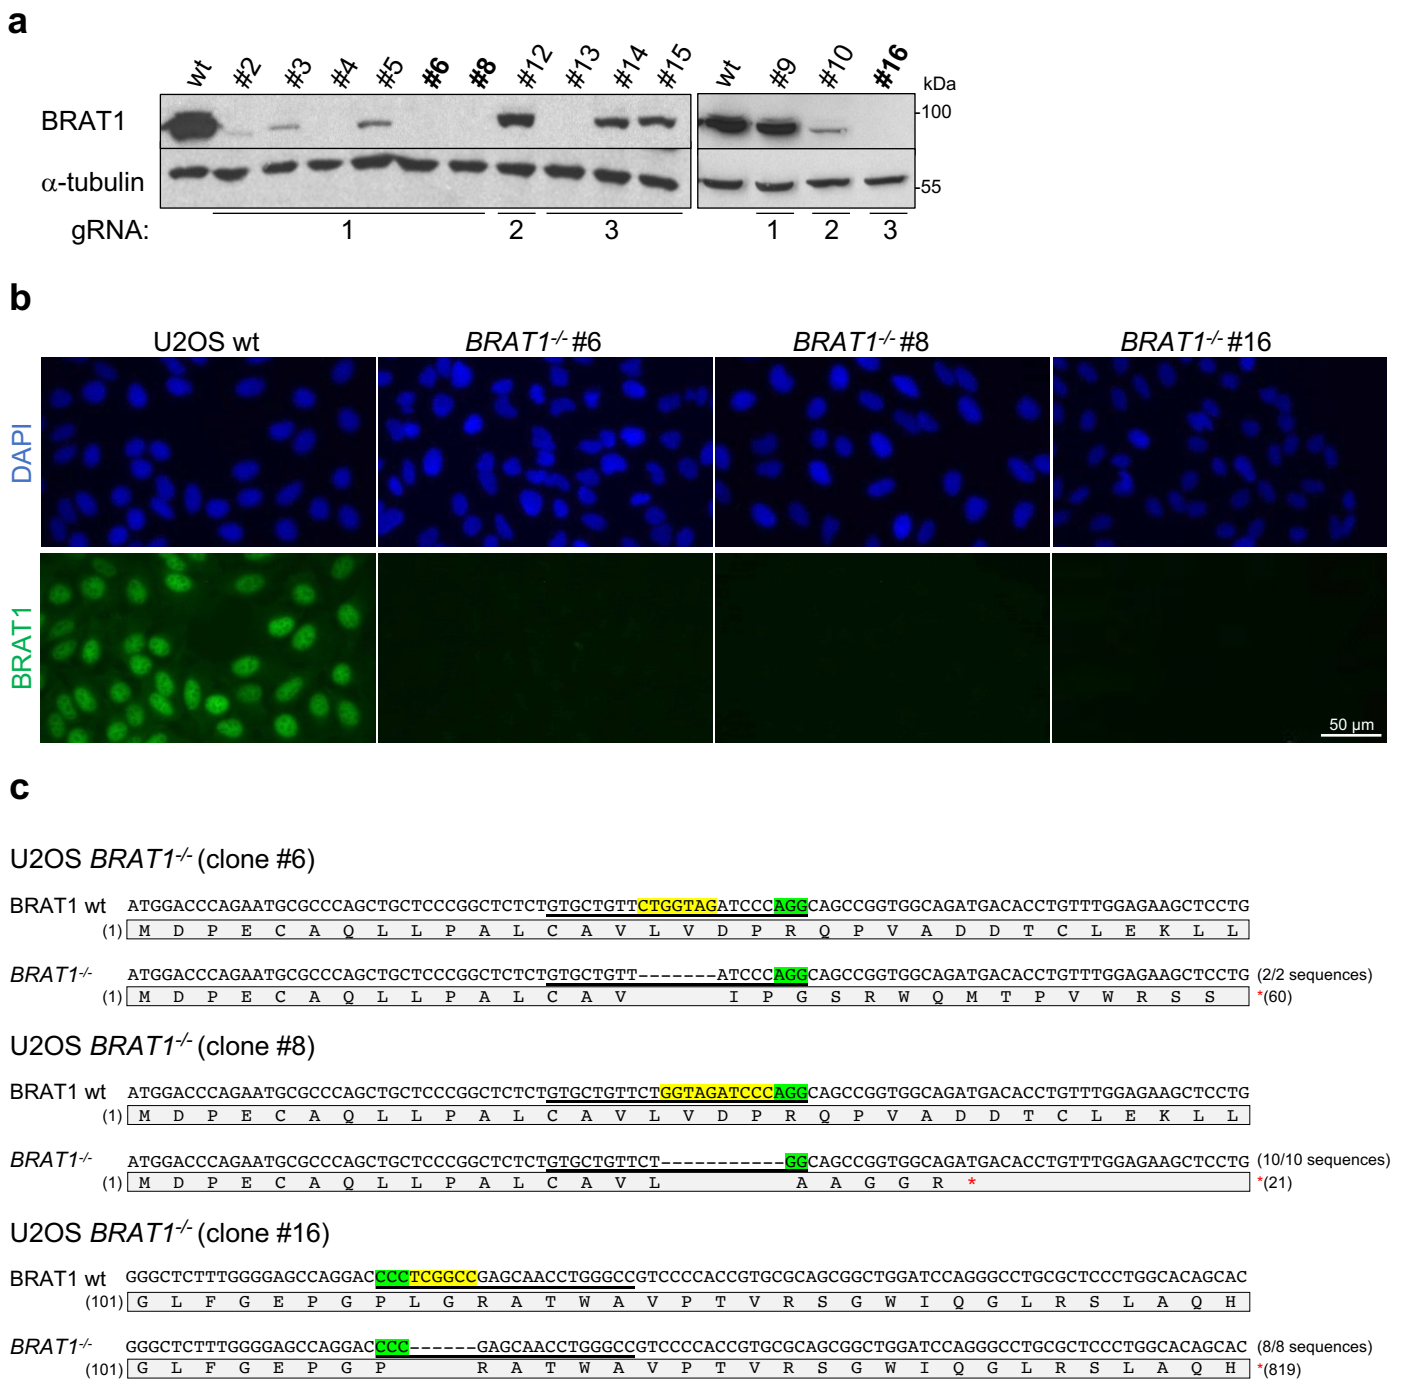

## Supplementary Fig. 1

### Characterization of *BRAT1* gene-edited cell lines generated by CRISPR/Cas9.

**a** BRAT1 protein levels in wild-type U2OS (wt) cells and gene-edited clones targeted with different *BRAT1* gRNA, as indicated, were analysed by western blotting. **b** Selected *BRAT1*<sup>-/-</sup> cell lines (clones #6, #8, and #16) immunostained with BRAT1 antibody. Representative wide-field images are shown. **a, b** The experiment was performed three times with similar results. **c** Confirmation of *BRAT1* gene editing in clones #6, #8, and #16 by PCR amplification of genomic DNA spanning the gRNA target site followed by subcloning and Sanger sequencing. CRISPR/Cas9 guides are underlined in wild type sequences (*BRAT1* wt) and the associated PAM is indicated in *green*, deletions in *yellow*, and resulting stop codons are indicated by a *red asterisk*.

**a**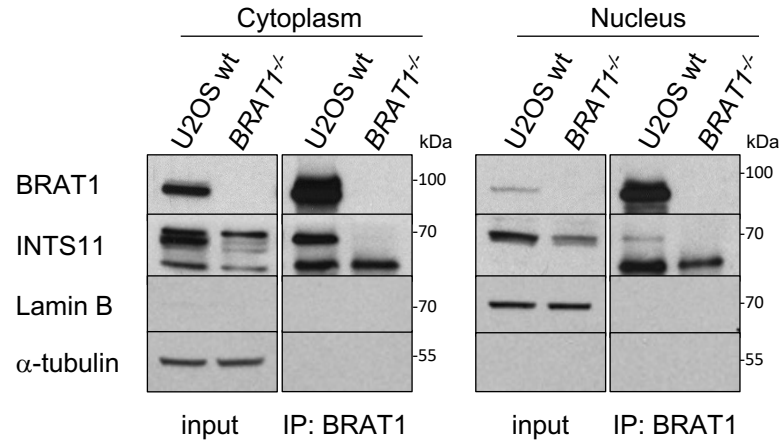**b**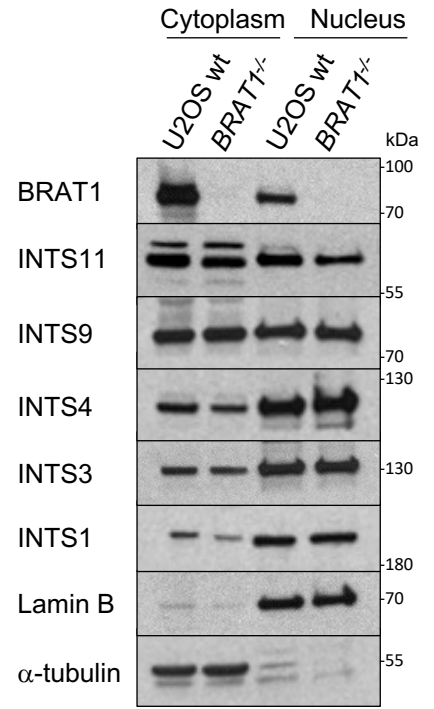**c**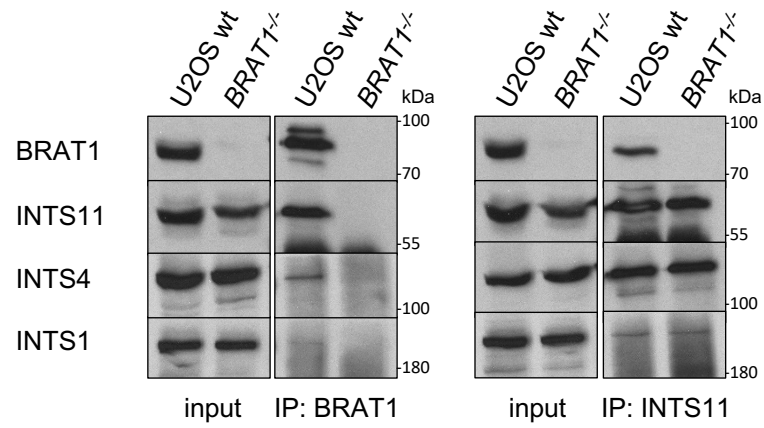**d**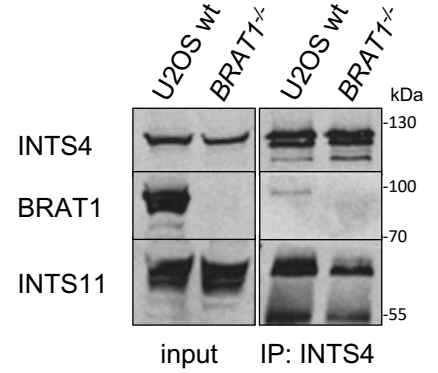**e**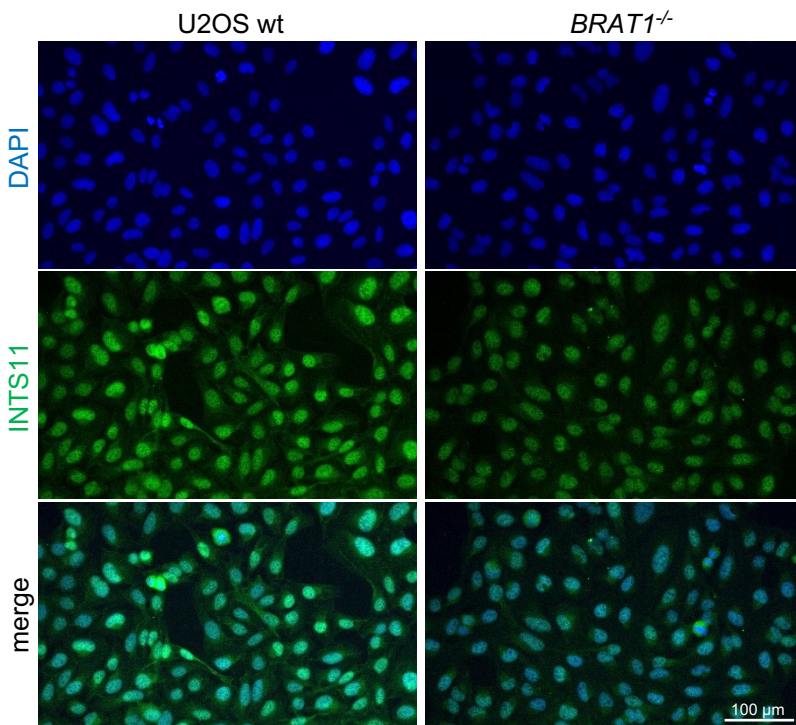

## Supplementary Fig. 2

### BRAT1 interacts with INTS11.

**a** Levels of BRAT1, INTS11, Lamin B and  $\alpha$ -tubulin in BRAT1 immunoprecipitates from cytoplasmic and nuclear fractions of wild type (U2OS wt) and *BRAT1*<sup>-/-</sup> (clone #8) cells, measured by western blotting. **b** Immunoblot of various Integrator subunits in cytoplasmic and nuclear fractions of wild type (U2OS wt) and *BRAT1*<sup>-/-</sup> (clone #8) cells, as indicated. Samples derived from the same experiment and blots were processed in parallel. **c** Levels of BRAT1, INTS11, INTS4 and INTS1 in BRAT1 (*left*) and INTS11 (*right*) immunoprecipitates from wild type (U2OS wt) and *BRAT1*<sup>-/-</sup> (clone #8) cells, measured by western blotting. **d** Levels of INTS4, BRAT1 and INTS11 in INTS4 immunoprecipitates from wild type (U2OS wt) and *BRAT1*<sup>-/-</sup> (clone #8) cells, measured by Western blotting. **a, b, c, d** The experiment was performed three times with similar results. Uncropped and unprocessed scans are provided in the Source Data file. **e** Immunofluorescence staining of INTS11 (*green*) in wild type (U2OS wt) and *BRAT1*<sup>-/-</sup> (clone #8) cells. Nuclei were visualized by DAPI (*blue*). The experiment was performed three times with similar results.

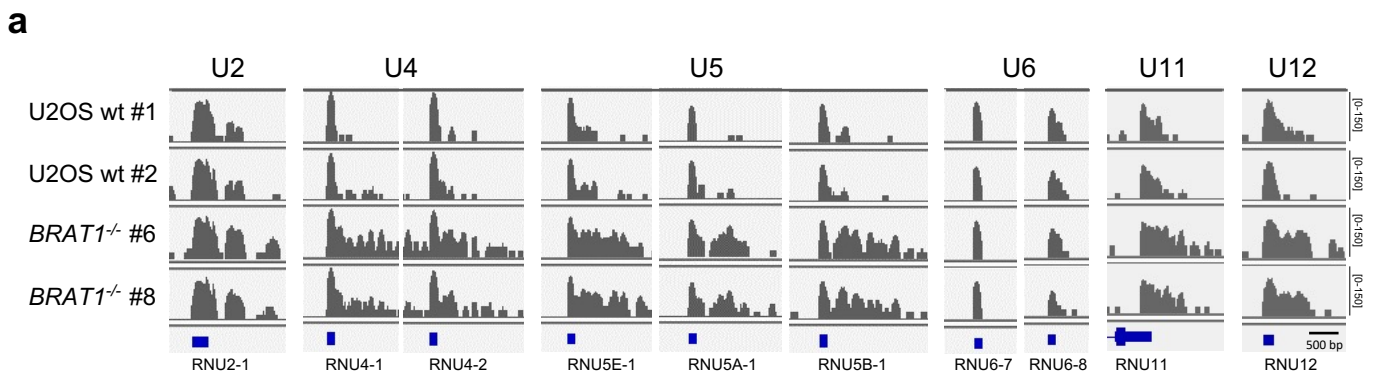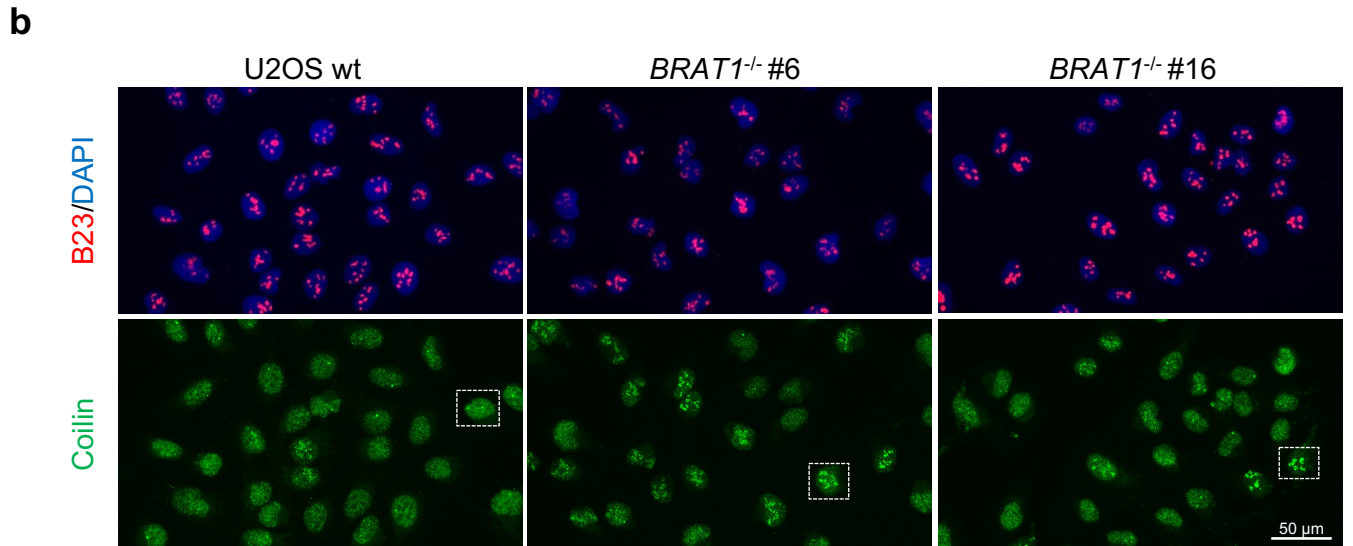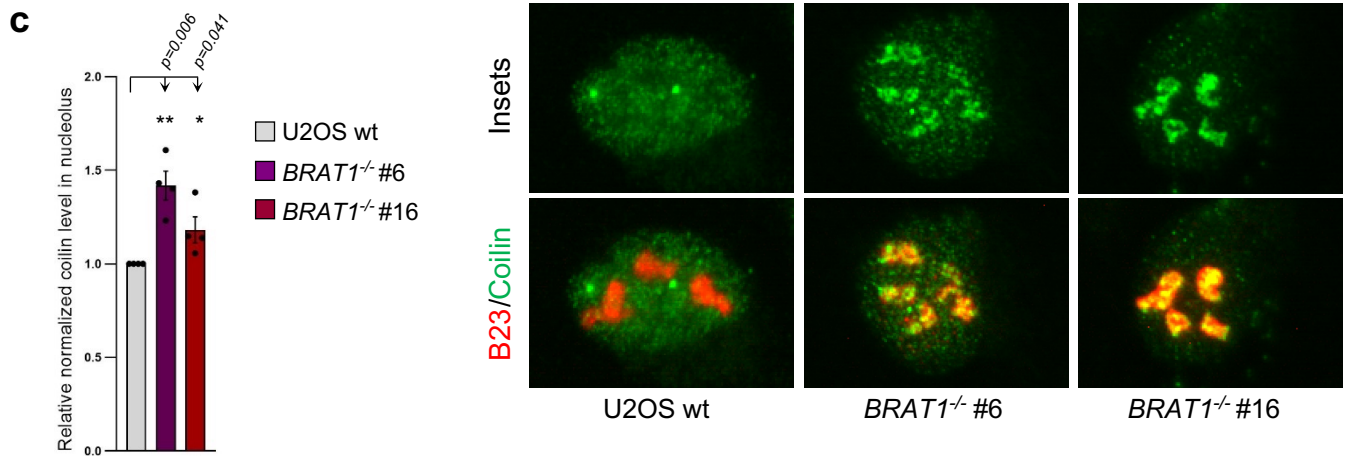

### Supplementary Fig. 3

#### BRAT1 depletion impairs the efficient 3' end processing of UsnRNAs and the structural integrity of Cajal bodies.

**a** RNA-seq read coverage for genes coding U2, U4, U5, U6, U11, or U12 snRNA in wild type U2OS (wt #1 and wt #2) and *BRAT1*<sup>-/-</sup> (clone #6 and #8) cells are shown, as indicated. **b** Immunofluorescence staining of subnuclear structures in wild type (U2OS wt) and *BRAT1*<sup>-/-</sup> (clone #6 and #16) cells. Cajal bodies were visualized by immunostaining of coilin (green), nucleoli by B23 (red), and nuclei by DAPI (blue). **c** Quantification of normalized fluorescent coilin signal inside the nucleolus using ScanR software; representative pictures are shown in (b). Data are represented as the mean  $\pm$  SD (n = 4). Statistical significance was determined by a one-sided paired Student's t-test (\*p < 0.05, \*\*p < 0.01).

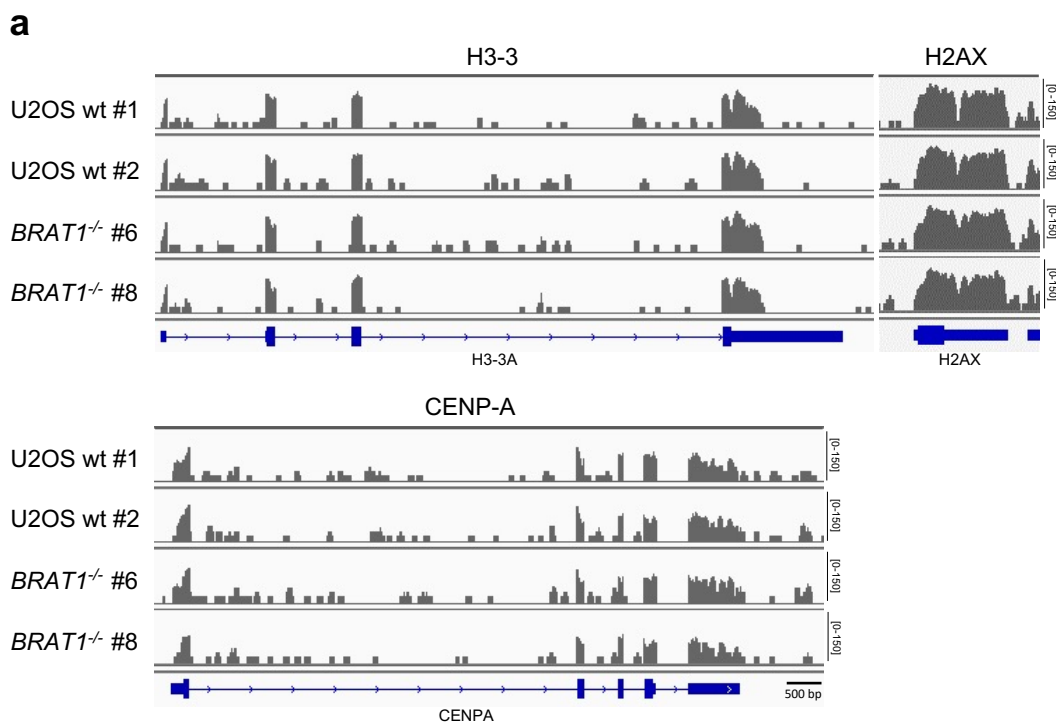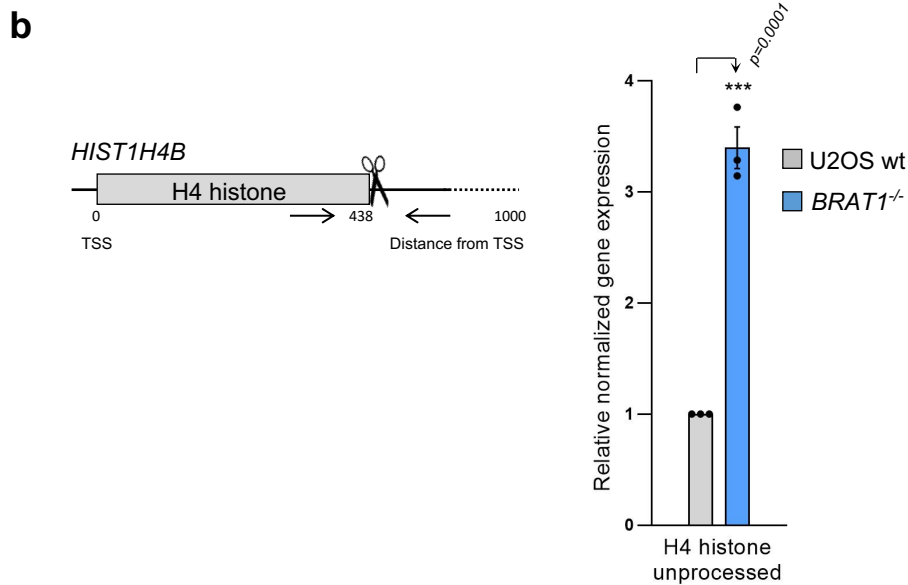

**Supplementary Fig. 4**

**mRNA levels of replication-independent histone variants are unaffected in *BRAT1*<sup>-/-</sup> cells.**

**a** RNA-seq read coverage for genes coding histones H3-3, H2AX, or CENP-A in wild type U2OS (wt #1 and wt #2) and *BRAT1*<sup>-/-</sup> (clone #8 and #6) cells are shown, as indicated. **b** Schematic representation of binding sites for primers used for RT-qPCR (arrows), a cleavage site (scissors), and RT-qPCR analysis of unprocessed *HIST1H4B* transcripts in wild type (U2OS wt) and *BRAT1*<sup>-/-</sup> (clone #8) cells. Data are represented as the mean  $\pm$  SD (n = 3). Statistical significance was determined by a one-sided paired Student's t-test (\*\*\*p < 0.001).

**a**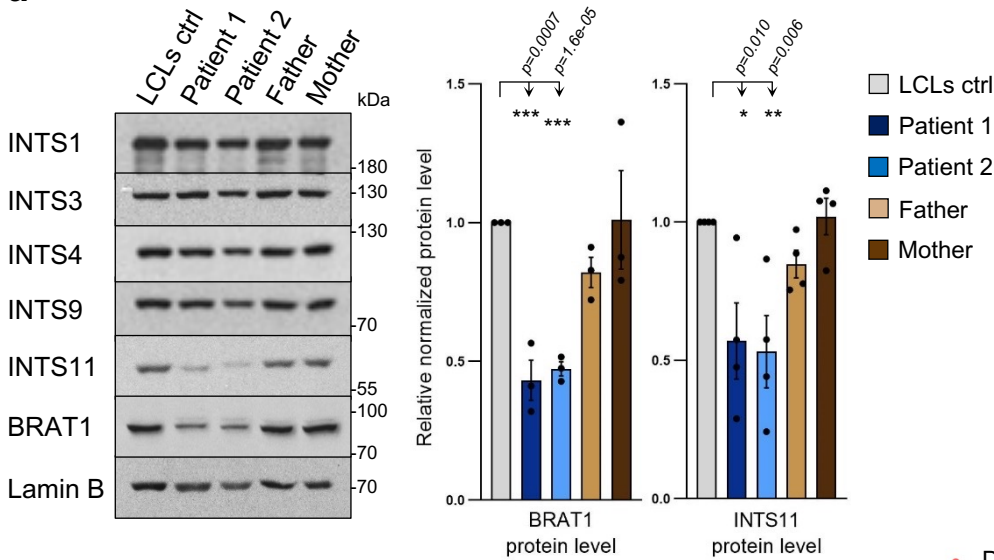**b**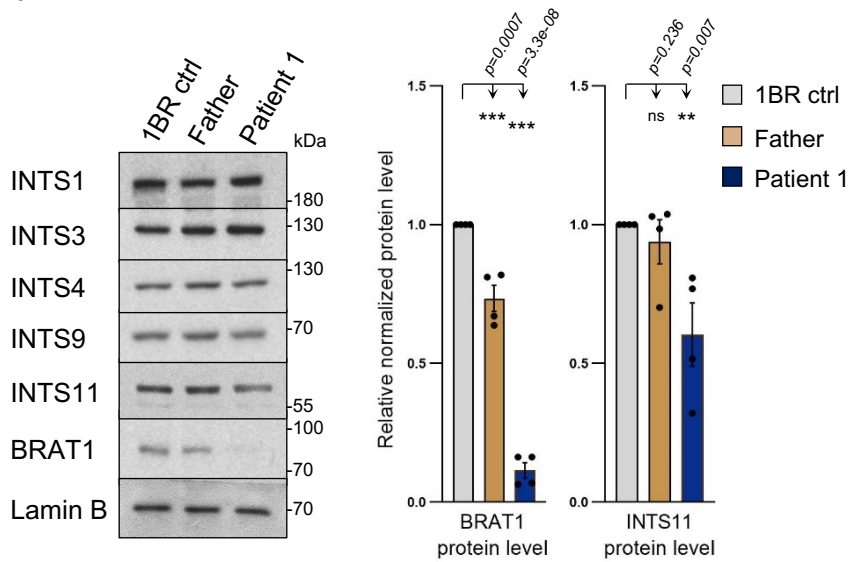**c**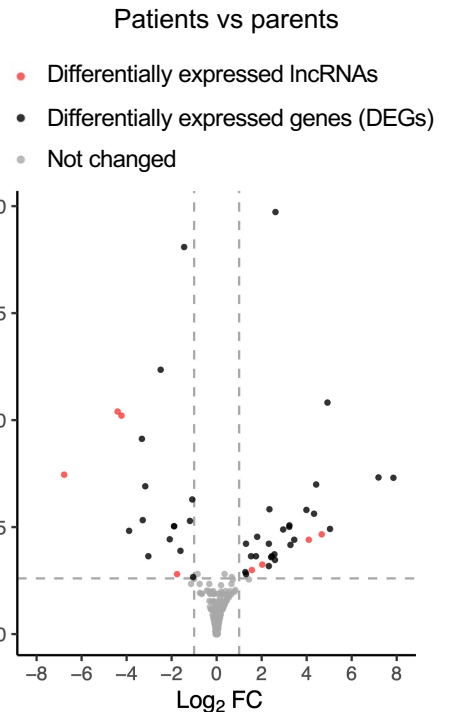**d**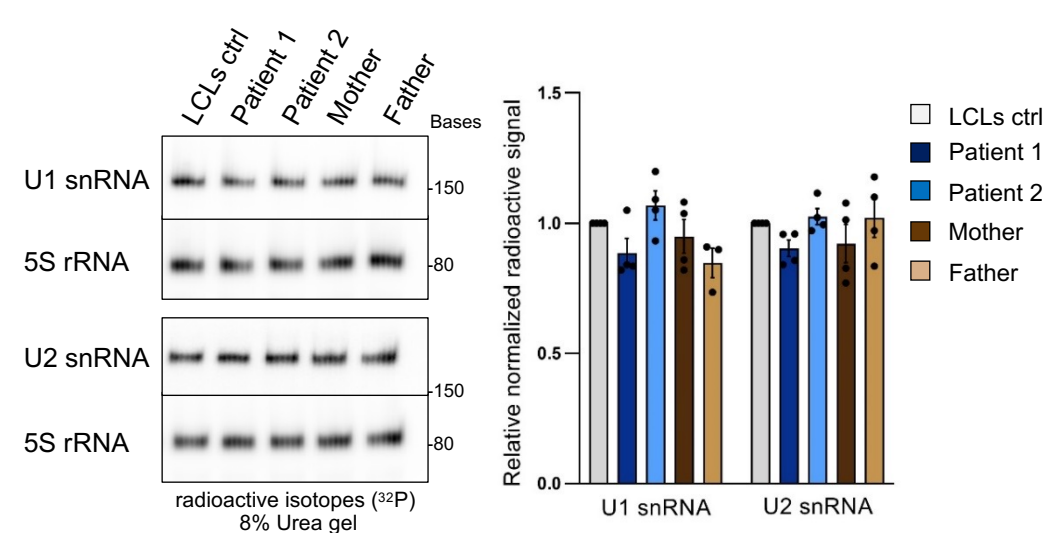**e**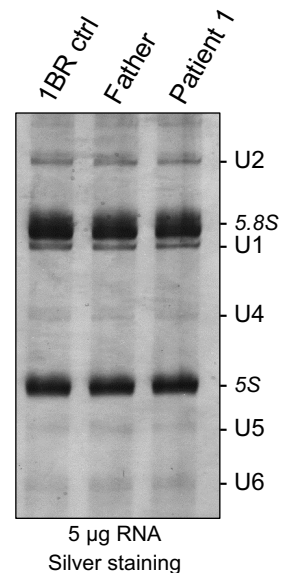

## Supplementary Fig. 5

### Reduced INTS11 levels and deregulated transcription in BRAT1-mutated patient cells.

**a, b** Immunoblot and quantification of the indicated proteins in control, parent and BRAT1 patient-derived lymphoblastoid cells (LCLs) (**a**) and fibroblasts (**b**). Data are represented as the mean  $\pm$  SD ( $n = 3$  for BRAT1;  $n = 4$  for INTS11). Statistical significance was determined by a one-sided paired Student's t-test (\* $p < 0.05$ , \*\* $p < 0.01$ , \*\*\* $p < 0.001$ , ns - not significant). Samples derived from the same experiment and blots were processed in parallel. **c** Volcano plot of BRAT1-patients (Patient 1 and Patient 2) vs parents (Mother and Father) LCLs transcription profiles showing differentially expressed genes (DEGs) and differentially expressed lncRNAs. Log<sub>2</sub> ratio for upregulated genes  $\geq 1.0$  (FDR  $< 0.05$ ) and for downregulated genes  $\geq -1.0$  (FDR  $< 0.05$ ),  $n = 28722$ . **d** Total RNA was isolated from control, parent and BRAT1 patient-derived LCLs, as indicated, resolved on urea-PAGE, Northern blotted and probed against U1, U2 snRNA, and 5S rRNA. Representative blots and quantification are shown. Data are represented as mean  $\pm$  SD ( $n = 4$ ). **e** Total RNA was isolated from control (1BR), Father and BRAT1 patient-derived fibroblasts, resolved on urea-PAGE, and silver-stained. **a, b, d, e** Uncropped and unprocessed scans are provided in the Source Data file.

**Supplementary Data 1. BRAT1 interacting partners identified by mass spectrometry.**

**Supplementary Data 2. Differentially expressed genes in *BRAT1*<sup>-/-</sup> cells.**

**Supplementary Data 3. Differentially expressed genes in BRAT1-mutated patient cells.**
