# Supplementary material for: BRAT1 links Integrator and defective RNA processing with neurodegeneration
Source: PubMed Central journal article supplement (PMC9418311; doi:10.1038/s41467-022-32763-6), 2022-08-26
Supplement: 41467_2022_32763_MOESM3_ESM.pdf [file 41467_2022_32763_MOESM3_ESM.pdf]

## **Description of Additional Supplementary Files**

**Supplementary Data 1.** BRAT1 interacting partners identified by mass spectrometry.

**Supplementary Data 2.** Differentially expressed genes in BRAT1<sup>-/-</sup> cells.

**Supplementary Data 3.** Differentially expressed genes in BRAT1-mutated patient cells.
